# Supplementary material for: Supportive-Expressive Group Therapy Intervention for Negative Affect in Cervical Cancer Patients
Source: Research Square preprint supplement (doi:10.21203/rs.3.rs-7431527/v1), 2025-10-16
Supplement: Supplementary file 1 [file 51e05163c1616ea982302d75.docx]

**Table 2. Baseline Characteristics**

| ariable | Study Group (n=60) | Control Group (n=60) | P-value |
| --- | --- | --- | --- |
| **Age (years)** |  |  | 0.905 |
| 18~39 | 21 | 19 |  |
| 40~59 | 20 | 20 |  |
| ≥60 | 19 | 21 |  |
| Residential status |  |  | 0.843 |
| Urban | 42 | 41 |  |
| Rural | 18 | 19 |  |
| Education level |  |  | 0.468 |
| Primary or below | 3 | 7 |  |
| Junior high | 24 | 20 |  |
| Senior high/vocational | 22 | 19 |  |
| College or above | 11 | 14 |  |
| Employment status |  |  | 0.335 |
| Employed | 31 | 23 |  |
| Unemployed | 19 | 25 |  |
| Retired | 10 | 12 |  |
| Marital status |  |  | 0.771* |
| Married | 54 | 53 |  |
| Single | 3 | 3 |  |
| Divorced | 1 | 3 |  |
| Widowed | 2 | 1 |  |
| Number of children |  |  | 0.056* |
| 0 | 3 | 3 |  |
| 1 | 42 | 52 |  |
| ≥2 | 15 | 5 |  |
| Payment method |  |  | 0.135 |
| Employee insurance | 30 | 35 |  |
| Resident insurance | 22 | 23 |  |
| Other | 8 | 2 |  |
| Monthly household income (¥) |  |  | 0.082 |
| <2000 | 11 | 11 |  |
| 2000~3999 | 27 | 16 |  |
| ≥4000 | 22 | 33 |  |
| Pathological type |  |  | 1.000 |
| Squamous carcinoma | 56 | 57 |  |
| Adenocarcinoma | 4 | 3 |  |
| Pathological stage |  |  | 0.167 |
| I | 18 | 12 |  |
| II | 18 | 12 |  |
| III | 13 | 17 |  |
| IV | 11 | 19 |  |
| Treatment modality |  |  | 0.532* |
| Surgery | 2 | 3 |  |
| Surgery + chemotherapy | 7 | 4 |  |
| Surgery + radiotherapy | 6 | 3 |  |
| Multimodal therapy | 45 | 50 |  |
| Recurrence/metastasis | 3 | 3 | 1.000* |
| Regular follow-up | 55 | 57 | 0.717* |

Note: P-values marked with * were calculated using Fisher's exact test.
