# Supplementary material for: Supportive-Expressive Group Therapy Intervention for Negative Affect in Cervical Cancer Patients
Source: Research Square preprint supplement (doi:10.21203/rs.3.rs-7431527/v1), 2025-10-16
Supplement: Supplementary file 2 [file 58a819868f1e3a9a500a5ee3.docx]

**Table 5. Symptom self-assessment of patients before and after intervention**

| Variable | Time | Study Group (n=60) | Control Group (n=60) | *P*-value |
| --- | --- | --- | --- | --- |
| Somatization | Pre-intervention | 26.88±2.56 | 26.85±2.75 | 0.945 |
|  | Post-intervention | 15.28±1.80* | 19.90±1.83* | <0.001 |
| Hostility | Pre-intervention | 13.82±2.93 | 13.75±3.00 | 0.902 |
|  | Post-intervention | 7.52±1.53* | 10.52±1.47* | <0.001 |
| Interpersonal sensitivity | Pre-intervention | 22.53±3.09 | 23.40±2.84 | 0.112 |
|  | Post-intervention | 13.42±1.49* | 18.15±1.95* | <0.001 |
| Depression | Pre-intervention | 31.60±3.78 | 31.22±4.02 | 0.592 |
|  | Post-intervention | 20.58±3.33* | 24.98±3.31* | <0.001 |
| Anxiety | Pre-intervention | 23.33±2.55 | 22.67±2.57 | 0.156 |
|  | Post-intervention | 11.93±2.19* | 18.27±1.91* | <0.001 |
| Obsessive-compulsive | Pre-intervention | 24.58±2.91 | 24.60±2.78 | 0.974 |
|  | Post-intervention | 13.10±1.78* | 19.57±1.83* | <0.001 |
| Phobic anxiety | Pre-intervention | 19.92±2.29 | 20.32±2.59 | 0.372 |
|  | Post-intervention | 10.13±1.77* | 15.02±1.81* | <0.001 |
| Paranoid ideation | Pre-intervention | 13.10±2.33 | 13.73±2.77 | 0.178 |
|  | Post-intervention | 6.82±1.53* | 9.88±1.45* | <0.001 |
| Psychoticism | Pre-intervention | 22.97±4.70 | 22.70±3.61 | 0.728 |
|  | Post-intervention | 12.02±3.15* | 19.58±3.18* | <0.001 |

Note: *: Compared with Pre-intervention, the difference was statistically significant.
