# Supplementary material for: Supportive-Expressive Group Therapy Intervention for Negative Affect in Cervical Cancer Patients
Source: Research Square preprint supplement (doi:10.21203/rs.3.rs-7431527/v1), 2025-10-16
Supplement: Supplementary file 3 [file 92cd83bfdf68baec117a061a.docx]

**Table 3. Negative Emotions and Social Support**

| Variable | Time | Study Group (n=60) | Control Group (n=60) | *P*-value |
| --- | --- | --- | --- | --- |
| SAS | Pre-intervention | 54.77±5.73 | 55.93±6.70 | 0.307 |
|  | Post-intervention | 41.40±3.63* | 49.15±4.65* | <0.001 |
| SDS | Pre-intervention | 46.92±3.16 | 46.35±2.77 | 0.298 |
|  | Post-intervention | 37.95±2.82* | 41.18±3.06* | <0.001 |
| Internal support | Pre-intervention | 23.02±2.39 | 22.68±2.98 | 0.500 |
|  | Post-intervention | 27.48±2.94* | 25.47±2.72* | <0.001 |
| External support | Pre-intervention | 39.05±5.36 | 38.48±6.36 | 0.599 |
|  | Post-intervention | 44.32±4.56* | 40.80±4.40* | <0.001 |

Note: *: Compared with Pre-intervention, the difference was statistically significant.
