# Supplementary material for: Supportive-Expressive Group Therapy Intervention for Negative Affect in Cervical Cancer Patients
Source: Research Square preprint supplement (doi:10.21203/rs.3.rs-7431527/v1), 2025-10-16
Supplement: Supplementary file 4 [file e6608979d9c265beb565c20f.docx]

**Table 4. Quality of life of patients pre-intervention and post-intervention**

| Variable | Time | Study Group (n=60) | Control Group (n=60) | *P*-value |
| --- | --- | --- | --- | --- |
| Overal health status | Pre-intervention | 49.83±7.85 | 48.83±7.48 | 0.476 |
|  | Post-intervention | 63.57±7.31* | 55.32±7.81* | <0.001 |
| Cognitive functioning | Pre-intervention | 76.72±10.86 | 78.97±9.70 | 0.234 |
|  | Post-intervention | 79.92±8.94 | 80.67±8.63 | 0.641 |
| Physical functioning | Pre-intervention | 63.28±10.02 | 65.92±10.05 | 0.153 |
|  | Post-intervention | 72.98±10.75* | 68.43±8.84 | 0.013 |
| Emotional functioning | Pre-intervention | 60.12±9.69 | 58.10±10.76 | 0.283 |
|  | Post-intervention | 63.43±7.82 | 64.13±9.58* | 0.662 |
| Role functioning | Pre-intervention | 38.73±8.57 | 38.18±7.10 | 0.703 |
|  | Post-intervention | 41.92±9.69 | 42.60±8.61* | 0.684 |
| Social functioning | Pre-intervention | 39.10±5.83 | 39.27±6.82 | 0.886 |
|  | Post-intervention | 51.95±8.55* | 45.37±7.80* | <0.001 |
| Fatigue | Pre-intervention | 52.52±8.95 | 54.23±9.93 | 0.322 |
|  | Post-intervention | 42.97±8.17* | 47.73±9.19* | 0.003 |
| Pain | Pre-intervention | 31.28±12.14 | 32.57±15.64 | 0.617 |
|  | Post-intervention | 25.08±4.82* | 25.10±4.36* | 0.984 |
| Nausea and vomiting | Pre-intervention | 13.97±5.80 | 14.32±4.63 | 0.715 |
|  | Post-intervention | 8.02±2.94* | 12.80±5.85 | <0.001 |

Note: *: Compared with Pre-intervention, the difference was statistically significant.
