# Supplementary material for: Supportive-Expressive Group Therapy Intervention for Negative Affect in Cervical Cancer Patients
Source: Research Square preprint supplement (doi:10.21203/rs.3.rs-7431527/v1), 2025-10-16
Supplement: Supplementary file 5 [file f81d4eb2e212034a9547fb98.docx]

**Table 1. Intervention Protocol**

| Phase | Theme | Activities |
| --- | --- | --- |
| **Phase 1** | Building Rapport | Therapist introduces group purpose and rules (confidentiality, mutual respect). Participants share names, ages, illness experiences, current emotions, expectations. Facilitator provides emotional support to establish safety and trust. Facilitator monitors group dynamics and guides discussions. |
| The leader encourages expression and observes any situation that occurs throughout the group's activities to keep track of the group's direction. |
| Phase 2 | Psychoeducation and Emotional Normalization | Goal: Accept negative reactions (such as fear, anxiety, despair, guilt, shame, etc.), understand positive and negative emotions; enhance cervical cancer-related knowledge, including definition and disease progression (leaders provide cervical cancer-related knowledge). |
| Activity: Design ' emotional card ', each participant must choose 6 cards from the cards containing positive and negative emotions to explain the emotions felt by each participant in their experience of cervical cancer and discuss positive and negative emotions. |
| Phase 3 | Promote emotional disclosure and communication | Goal: Increase emotional expression, practice communication skills, and properly express emotions and experiences related to cervical cancer. |
| Activity: 'Communication card ', each participant needs to choose a set of cards, which describes a hypothetical situation. The card includes both positive and negative behaviors and the positive or negative results brought by the behavior, involving communication strategies. |
| Phase 4 | Practice emotional self-regulation skills | Goal: To develop stress management for individual adjustment of disease-related emotions and reactions, and to promote the use of self-regulation techniques. |
| Activity: Self-regulation strategy of stress management, learning abdominal breathing and progressive muscle relaxation exercises. |
| Phase 5 | Fears and concerns related to cervical cancer | Goal: Improve personal skills and adjust the expression of concerns and expectations about the future, including disease progression, treatment, and economic issues. |
| Activity: Participants were invited to write about invasive thoughts related to cervical cancer, and members were encouraged to speak their minds and express positive or negative emotions. |
| Leaders can use mindfulness exercises as a useful technique to change intrusive thoughts. |
| Phase 6 | Express ideas and tap core beliefs | Goal: Improve the balance and cognition of positive and negative emotions of cervical cancer experience. |
| Activity: Each participant was invited to write down their gains and losses in multiple areas of life as a result of cervical cancer experience, thinking about changes in core beliefs after cervical cancer diagnosis. At the end of the activity, a discussion is held about the number of loss gains reported by the group. |
| Phase 7 | Develop new values and lives | Goal: To expand the cognitive processing of core beliefs and personal values, to achieve a redefinition of life priorities and a reassessment of personal Goals, in line with the changes in identity that are now perceived. |
| Activity: Reflecting on the principles of life, ' encourage each participant to understand the previous principles of life and the new life principles and Goals that are more suitable for the current reality by answering the following questions: ' Please reflect on the principles of life that you have used throughout your life until now. ' |
| Leaders encourage participants to speak out about things, and teach members to break the inertia of thinking. |
| Phase 8 | Farewell and Outlook | Goal: Talk about separation, and redefine the new life Goal, in order to produce more adapt to the new reality and the current knowledge of life values. |
| Activity: Participants are invited to write down Goals, final hurdles and action plans to achieve Goals that they intend to achieve in the medium or long term. |
| Leaders guide members to discuss separation, encourage plans and arrangements after the end of the group, provide guidance and suggestions for members to return to life, remind members to prepare for continued growth of unresolved issues in the group, and remind confidentiality. A simple and warm ' farewell ceremony ' is held, such as lighting a candle symbolizing hope together, and then blowing it out together, which means moving towards a new life with hope and strength. |
